# Supplementary material for: Enhancement of triboelectricity based on fully organic composite films with a conducting polymer
Source: Royal Society of Chemistry journal article supplement (doi:10.1039/d1ra07408c), 2022-01-01
Supplement: d1ra07408c1.pdf [file d1ra07408c1.pdf]

## Electronic Supplementary Information

### Enhancement of triboelectricity based on fully organic composite films with conducting polymer

<sup>1</sup> Department of Physics, Yonsei University, 50 Yonsei-ro, Seodaemun-gu, Seoul 03722,  
Republic of Korea.

<sup>2</sup> Energy ICT Convergence Research Department, Energy Efficiency Research Division,  
Korea Institute of Energy Research, 152 Gajeong-ro, Yuseong-gu, Daejeon 34129, Republic  
of Korea.

\* Hakgeun Jeong and Kyung-Hwa Yoo are co-corresponding authors.

---

\*Corresponding author.

Email address: hgjeong@kier.re.kr (H.G Jeong), khyoo@yonsei.ac.kr (K.-H. Yoo)

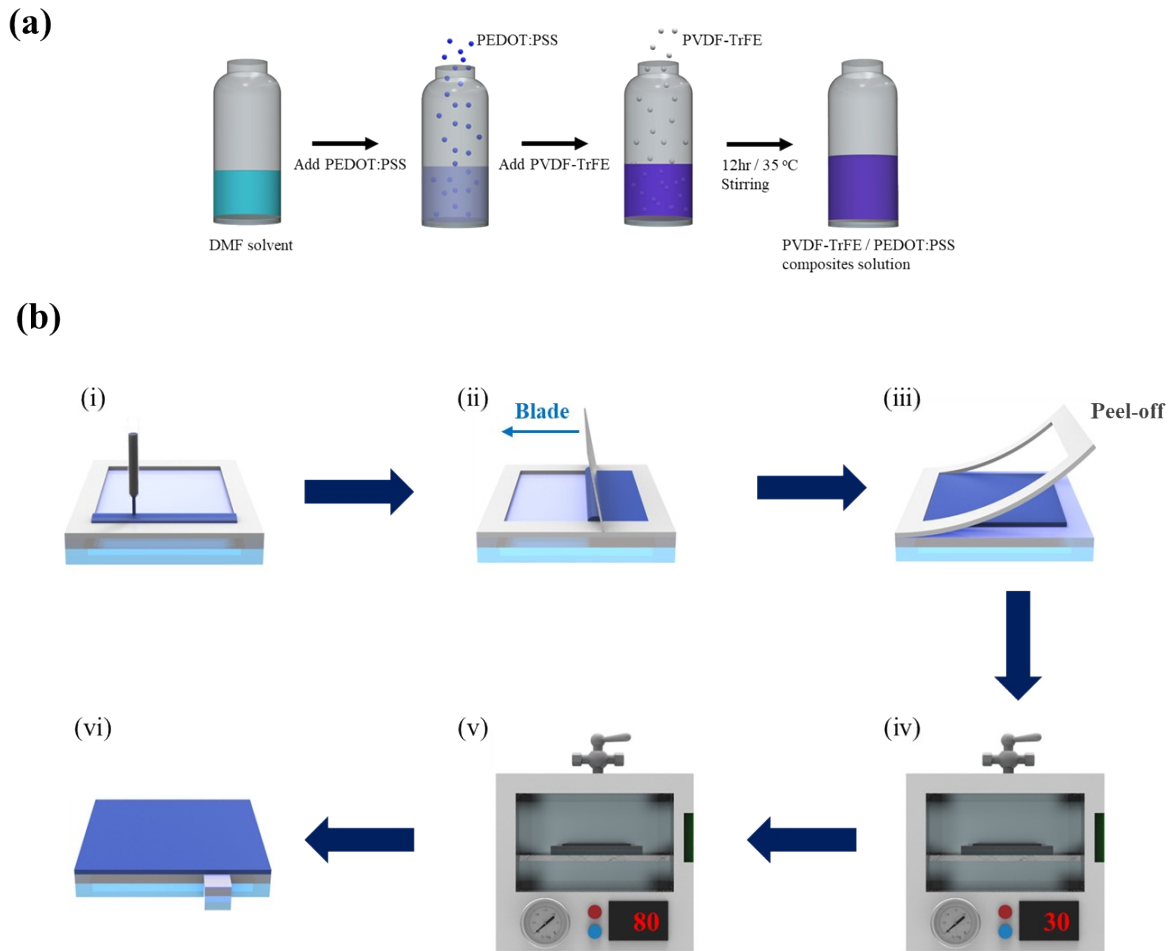

**Fig. S1** (a) Preparation of PVDF-TrFE/PEDOT:PSS composite solutions. (b) Illustration of the fabrication of PVDF-TrFE/PEDOT:PSS composite films. (i) Attached the silicone rubber mold ( $4 \times 4 \text{ cm}^2$ ) on ITO/PET substrate. And PVDF-TrFE/PEDOT:PSS composite solutions were dropped 0.3 ml inner silicone rubber mold ( $3 \times 3 \text{ cm}^2$ ). (ii) The blade coating the solution. (iii) Peel off the silicone rubber mold. (iv) Vacuum process at  $30 \text{ }^\circ\text{C}$  for 1 h to enhance interfaces between electrode and composite films. (v) The composite films were annealed at  $80 \text{ }^\circ\text{C}$  for 3h. (vi) The composite film cropped except for the part where a copper wire was connected.

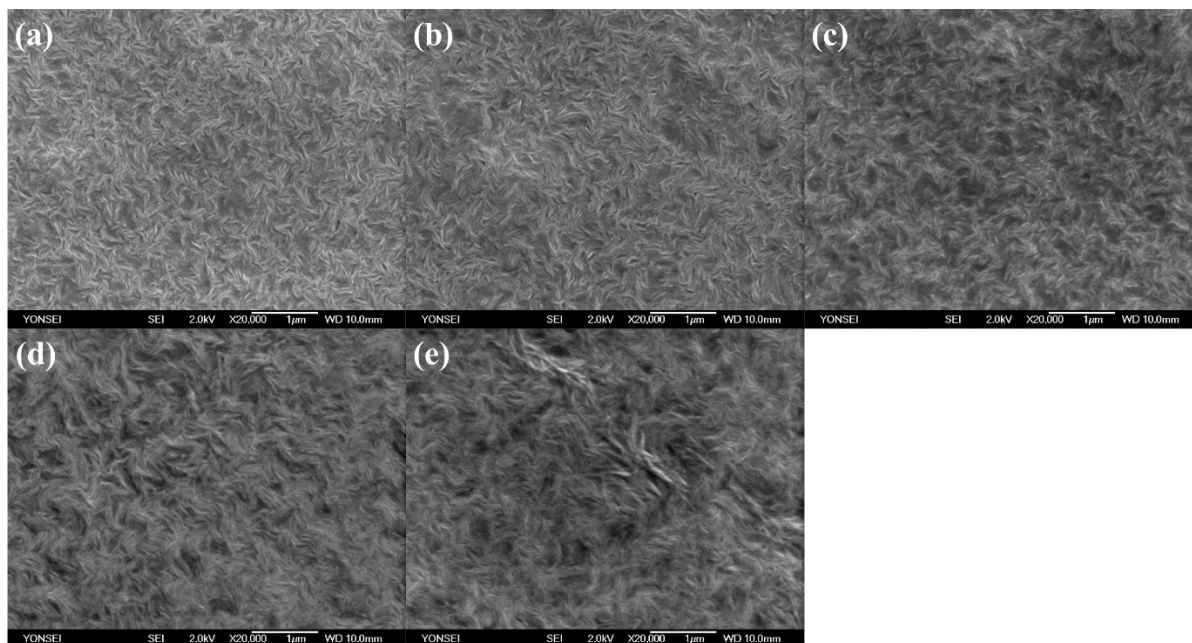

**Fig. S2** FE-SEM images of the surface morphology of the PVDF-TrFE/PEDOT:PSS composite films with different PEDOT:PSS contents from 0% to 40%: (a) PVDF-TrFE films, (b) PVDF-TrFE/ 10 wt% PEDOT:PSS, (c) PVDF-TrFE/ 20 wt% PEDOT:PSS, (d) PVDF-TrFE/ 30 wt% PEDOT:PSS and (e) PVDF-TrFE/ 40 wt% PEDOT:PSS

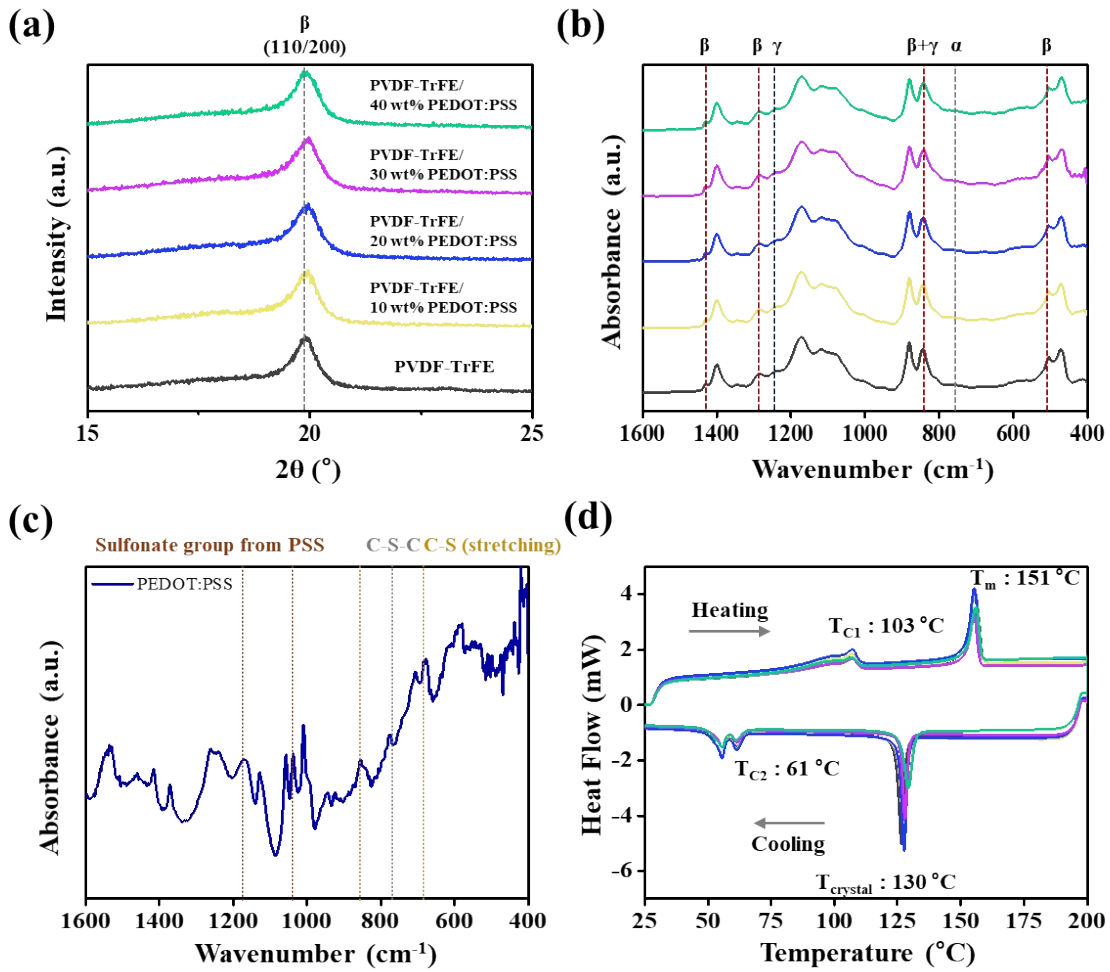

**Fig. S3** The PVDF-TrFE/PEDOT:PSS composite films with different PEDOT:PSS contents from 0% to 40%: (a) XRD analysis, (b) FT-IR spectra from 400  $\text{cm}^{-1}$  to 1600  $\text{cm}^{-1}$  and (c) FT-IR spectra of the PEDOT:PSS films from 400  $\text{cm}^{-1}$  to 1600  $\text{cm}^{-1}$ . (d) DSC heat flow vs. temperature during heating and cooling

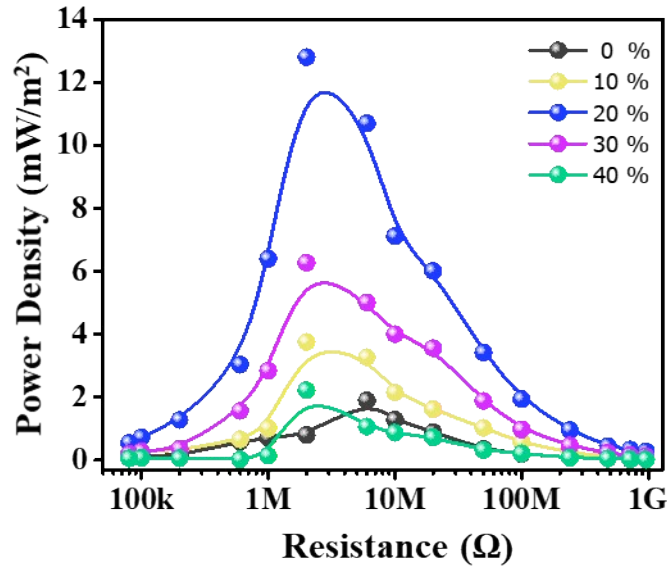

**Fig. S4** Power density of PVDF-TrFE/PEDOT:PSS composite films with different PEDOT:PSS contents from 0% to 40% under changing external load resistance.

**Table S1.** Power density of PVDF-TrFE/PEDOT:PSS composite films with different PEDOT:PSS contents from 0% to 40% under changing external load resistance.

|                                          | PVDF-TrFE | 10 wt%<br>PEDOT:PS<br>S | 20 wt%<br>PEDOT:PS<br>S | 30 wt%<br>PEDOT:PS<br>S | 40 wt%<br>PEDOT:PS<br>S |
|------------------------------------------|-----------|-------------------------|-------------------------|-------------------------|-------------------------|
| Resistance<br>(Ω)                        | 6M        | 2M                      | 2M                      | 2M                      | 2M                      |
| Power<br>density<br>(mW/m <sup>2</sup> ) | 1.89      | 3.75                    | 12.8                    | 6.27                    | 2.22                    |

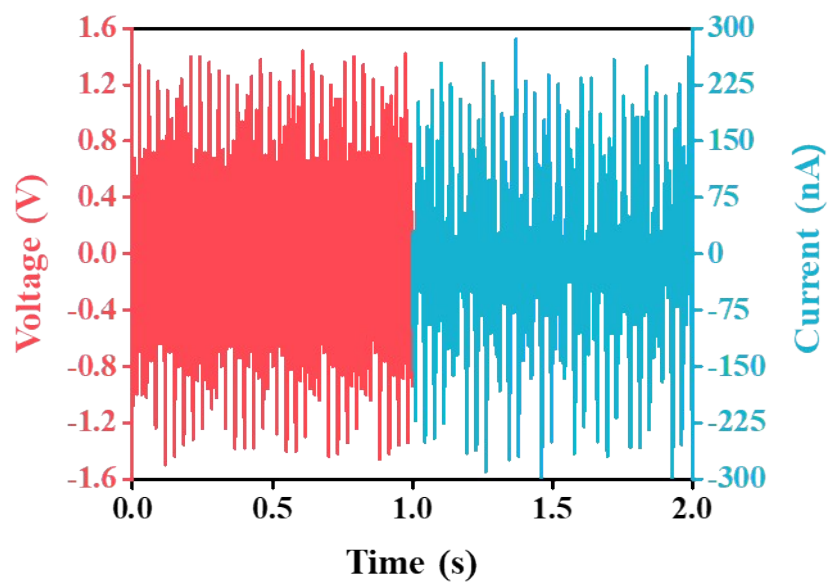

**Fig. S5** The electrical output voltage and current of PVDF-TrFE films of FTENG by electric fan.

**Table S2.** Comparison of the TENGs systems based on PVDF composites with nanofiller.

| Host Material | Nanofiller                                    | Structure                  | Opposite Materials                     | $V_o$ (V) | $I_{sc}$                     | Power Density                                  | Input Condition | Refs.     |
|---------------|-----------------------------------------------|----------------------------|----------------------------------------|-----------|------------------------------|------------------------------------------------|-----------------|-----------|
| PVDF-TrFE     | MoS <sub>2</sub>                              | Composite films            | Nylon/MoS <sub>2</sub> composite films | 145       | 350 $\mu$ A                  | 50 mW/cm <sup>2</sup> (@10M $\Omega$ )         | 0.25 MPa        | 13        |
| PVDF          | AgNW                                          | Nanofibers                 | Nylon nanofiber                        | 240       | 12 $\mu$ A                   | -                                              | 5 N             | 17        |
| PVDF-TrFE     | BaTiO <sub>3</sub>                            | Composite multilayer films | Al                                     | 44.5      | 1.77 $\mu$ A/cm <sup>2</sup> | 29.4 $\mu$ W/cm <sup>2</sup> (@100M $\Omega$ ) | 2 Hz            | 18        |
| PVDF-TrFE     | Polyaniline                                   | Porous aerogel             | -                                      | 246       | 122 $\mu$ A                  | 6.69 W/m <sup>2</sup> (@10M $\Omega$ )         | 30 Hz           | 28        |
| PVDF-TrFE     | ZrO <sub>2</sub>                              | Composite films            | Nylon/PMMA composite films             | 500       | 500 $\mu$ A/cm <sup>2</sup>  | 42 mW/cm <sup>2</sup> (@10M $\Omega$ )         | 10 Hz           | 29        |
| PVDF          | Ti <sub>3</sub> C <sub>2</sub> T <sub>x</sub> | Composite films            | Cu tape                                | 220       | 18 $\mu$ A                   | 2.6 mW (@10M $\Omega$ )                        | 4 Hz            | 30        |
| PVDF-TrFE     | PEDOT:PSS                                     | Composite films            | PI film                                | 15        | 2.3 $\mu$ A                  | 12.8 mW/m <sup>2</sup> (@6M $\Omega$ )         | 1 Hz            | This work |

**Video S1** FTENG acts according to flow rate of 6.5 m/s.

**Video S2** Nine commercial green light-emitting diodes lit on by FTENG.
